# Supplementary material for: Graphene-wrapped TiO2nanofibers with effective interfacial coupling as ultrafast electron transfer bridges in novel photoanodes
Source: Royal Society of Chemistry journal article supplement (doi:10.1039/c3ta13399k), 2013-10-31
Supplement: c3ta13399k.pdf [file c3ta13399k.pdf]

**Electronic supplementary information (ESI) for**

**Graphene-wrapped TiO<sub>2</sub> nanofibers with effective  
interfacial coupling as ultrafast electron transfer bridges in  
novel photoanodes**

Yunqian Dai,<sup>1,\*</sup> Yibai Sun,<sup>1</sup> Jing Yao,<sup>1</sup> Dandan Ling,<sup>1</sup> Yueming Wang,<sup>1</sup> Huan Long,<sup>1</sup>  
Xiaotian Wang,<sup>1</sup> Baoping Lin,<sup>1</sup> Tingying Helen Zeng<sup>2</sup> and Yueming Sun<sup>1,\*</sup>

<sup>1</sup>*School of Chemistry and Chemical Engineering, Southeast University, Nanjing,  
Jiangsu 211189, P. R. China*

<sup>2</sup>*Center for Excitonics, Research Laboratory for Electronics, Massachusetts Institute  
of Technology, Cambridge, Massachusetts 02139, USA*

\*Corresponding author: [daiy@seu.edu.cn](mailto:daiy@seu.edu.cn) and [sun@seu.edu.cn](mailto:sun@seu.edu.cn)

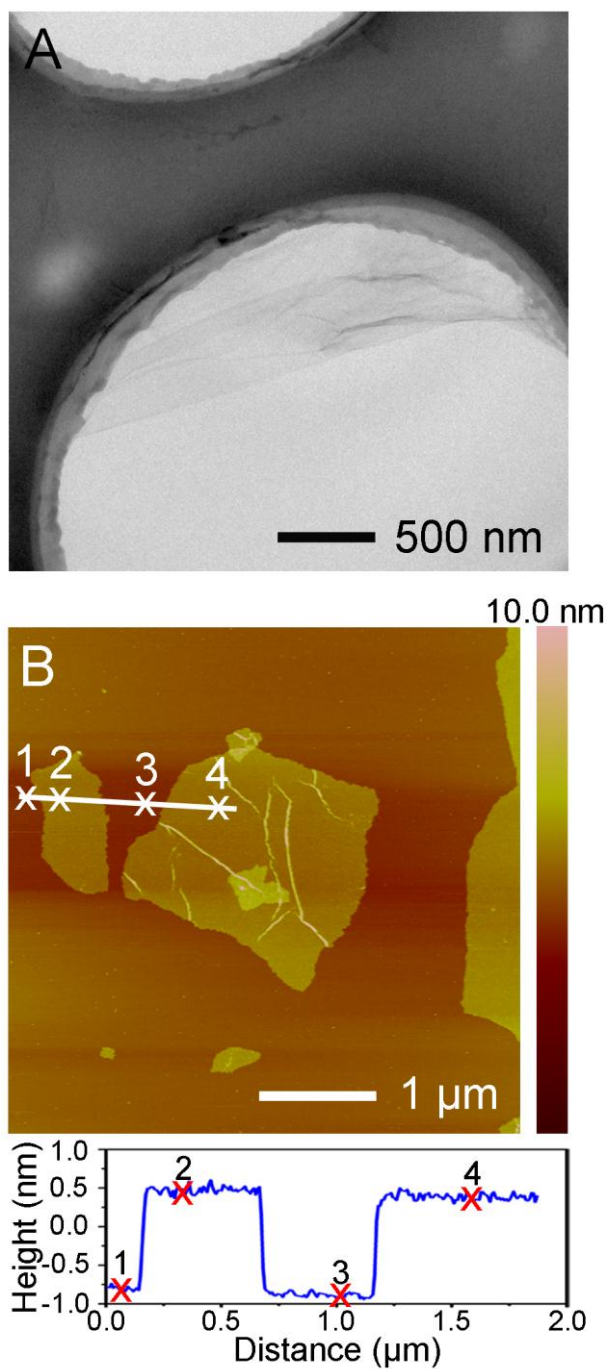

**Fig. S1** (A) TEM image of a piece of pristine graphene oxide (GO) sheet. (B) AFM image and height profiles of the same sample.

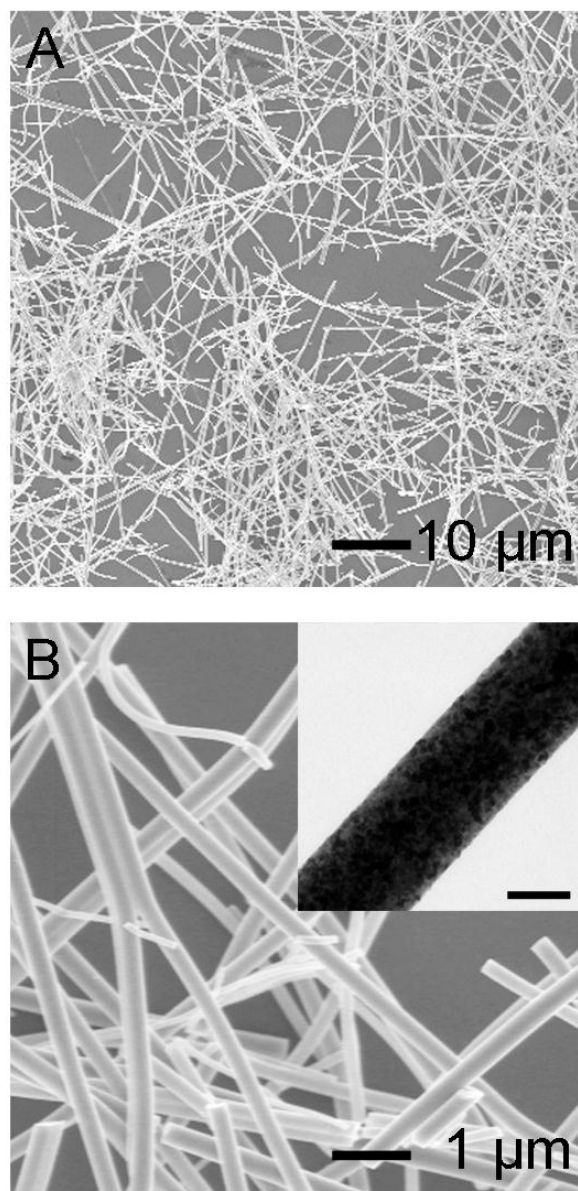

**Fig. S2** (A) SEM image of a typical sample of electrospun TiO<sub>2</sub> nanofibers. (B) SEM image of the same sample at a higher magnification with the inset showing its TEM image. The scale bar in the inset is 200 nm.

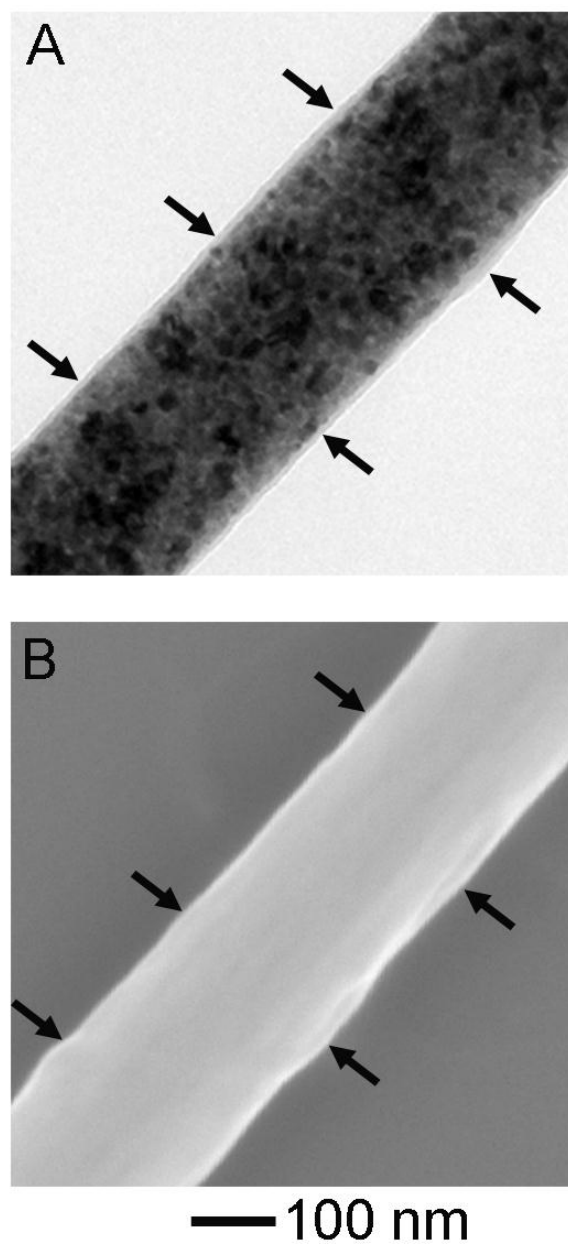

**Fig. S3** (A) TEM and (B) SEM images of one typical 0.8-RGO/TiO<sub>2</sub> nanofiber. The arrows marked the edges of RGO nanoshells.

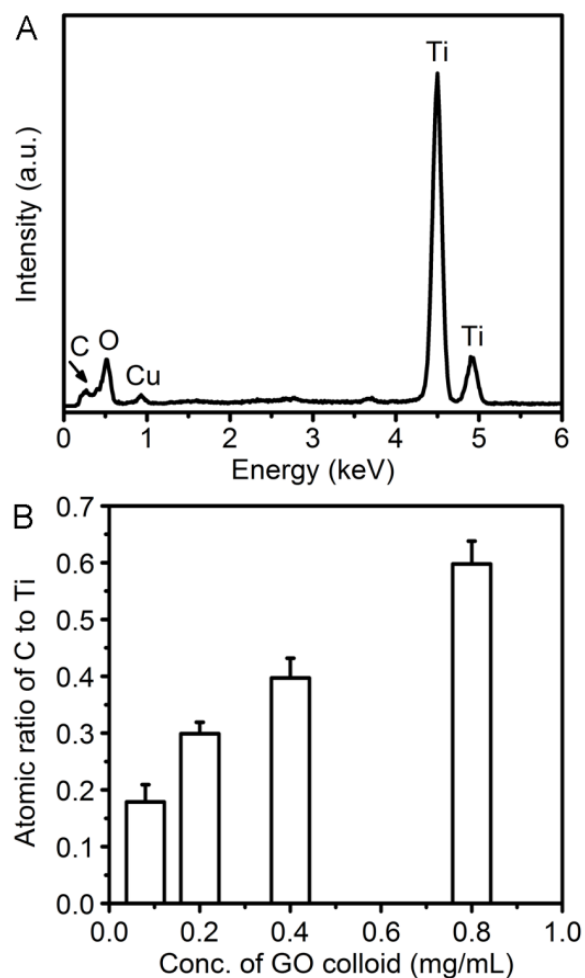

**Fig. S4** (A) A typical EDX spectrum of the 0.8-RGO/TiO<sub>2</sub> nanofibers in Fig. 1A. The signal of Cu is arisen from the copper square mesh. (B) A plot showing the dependence of the atomic ratio of C to Ti in products on the concentration of GO colloid.

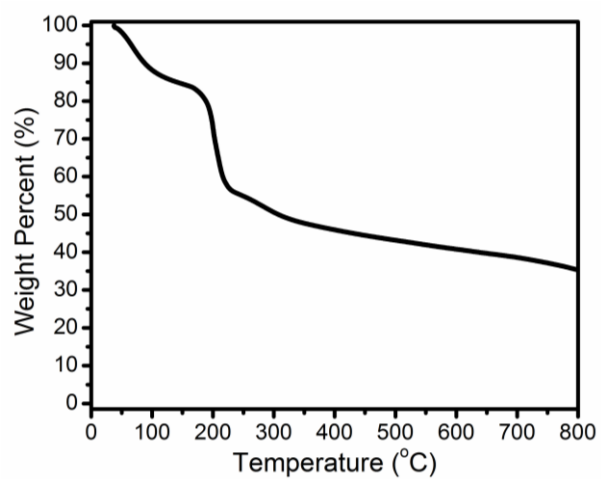

**Fig. S5** TGA curve of graphene oxide (GO) measured in N<sub>2</sub> gas.

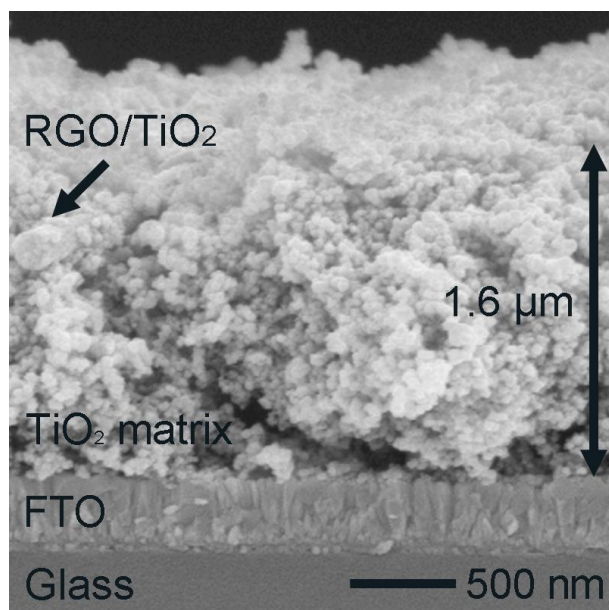

**Fig. S6** SEM image showing the cross-section profile of photoanode.

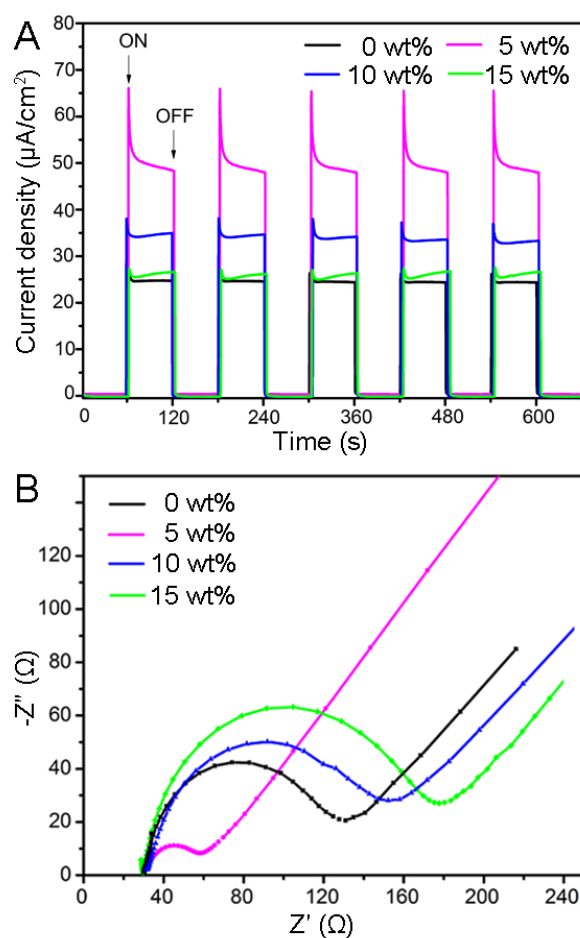

**Fig. S7** (A) The transient photocurrent density and (B) Nyquist diagram of photoanodes as a function of gradually increased weight ratio of 0.8-RGO/TiO<sub>2</sub> nanofibers.



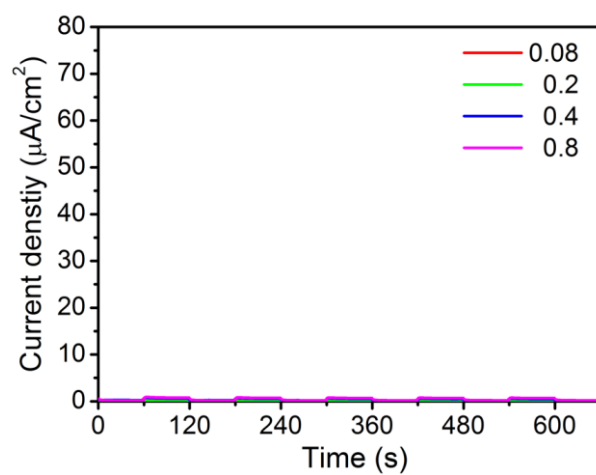

**Fig. S8** The transient photocurrent density profiles of photoanodes consisting 100 wt% of RGO/TiO<sub>2</sub> nanofibers made in four different GO concentrations.
